# Supplementary material for: Structural and Functional Characterization of RecG Helicase under Dilute and Molecular Crowding Conditions
Source: Hindawi journal article supplement (doi:10.1155/2012/392039), 2012-01-01
Supplement: f1 [file 392039.f1.pdf]

## Supporting information

### **Structural and Functional Characterization of RecG Helicase Enzyme under Dilute and Molecular Crowding Conditions**

Sarika Saxena,<sup>††</sup> Satoru Nagatoishi,<sup>‡</sup> Daisuke Miyoshi<sup>‡§</sup> and Naoki Sugimoto<sup>\*\*§</sup>

<sup>‡</sup>Frontier Institute for Biomolecular Engineering Research (FIBER), and <sup>§</sup>Institute of Biotechnology, Faculty of Frontiers of Innovative Research in Science and Technology (FIRST), Konan University, 7-1-20 Minatojima-Minamimachi, Chuo-ku, Kobe 650-0047, Japan.

Present address: <sup>†</sup>Amity Institute of Biotechnology, Amity University Uttar Pradesh, Sector-125, Expressway Highway, Noida 201303, India.

Corresponding author: NS, + 81-78-303-1416; Fax: 81-78-303-1495;

E-mail: sugimoto@konan-u.ac.jp

Pages 1 and 2: Contents

Page 3: Table S1. Sequences of DNA used in this study.

Page 4: Table S2.  $T_m$  values of RecG enzyme in different ionic conditions.

Page 5: Figure S1. Crystal structure of *Thermotoga maritime* RecG (PDB ID: 1GM5).

Page 6: Figure S2. CD spectra of RecG in the presence of 100 mM NaCl and 1 mM MgCl<sub>2</sub> with an increasing concentration of ATP and plot graph between molar ellipticity at 210 nm and 225 nm versus increasing concentration of [ATP].

Page 7: Figure S3. CD spectra of the RecG in the presence of 100 mM NaCl and 1 mM MgCl<sub>2</sub> or 5 mM MgCl<sub>2</sub>.

Page 8: Figure S4. CD melting curves of RecG in the presence of 100 mM NaCl and 1 mM MgCl<sub>2</sub> or 5 mM MgCl<sub>2</sub> in the absence and presence of 1 mM ATP at 222 nm.

Page 9: Figure S5. Normalized UV melting curves of the frayed duplex.

Page 9: Figure S6. Normalized UV melting curves of the stem region of frayed duplex in the presence of 100 mM NaCl and 1 mM MgCl<sub>2</sub> or 5 mM MgCl<sub>2</sub>.

Page 10: Figure S7 & S8. CD spectra of single strands of frayed duplex in the presence of 100 mM NaCl and 1 mM MgCl<sub>2</sub> or 5 mM MgCl<sub>2</sub> under dilute and molecular crowding conditions along with their secondary structures predicted using M fold.

Page 11: Figure S9. CD spectra of frayed duplex titrated with an increasing concentration of RecG and ATP in the presence of 100 mM NaCl and 1 mM MgCl<sub>2</sub> or 5 mM MgCl<sub>2</sub>.

## Supplementary materials

### *DNA sequences*

A 62-mer DNA oligonucleotide was designed to form a frayed DNA duplex containing non-complementary arms and stem region. This arrangement of bases within the target duplex mimics a replication fork. Truncated sequence constituting only the stem region was also studied separately under similar conditions.

---

**Table S1:** Sequences of DNA Used in This Study <sup>a</sup>

---

| abbreviation | Sequences                                                             |
|--------------|-----------------------------------------------------------------------|
| 1. FD-1      | 5'-TGGGTGAACCTGCAGGTGGGCAAAGATGTCCTAGCAATGTAATCGTCAAGCTTTATGCCGTT-3'  |
| 2. FD-2      | 5'-CAACGGCATAAAGCTTGACGATTACATTGCTAGGACATGCTGTCTAGAGGATCCGACTATCGA-3' |
| 3. Stem-1    | 5'-ATGTCCTAGCAATGTAATCGTCAAGCTTTATGCCGTT-3'                           |
| 4. Stem-2    | 5'-CAACGGCATAAAGCTTGACGATTACATTGCTAGGACAT-3'                          |

---

**Table S2.** Melting temperature of 5  $\mu$ M RecG evaluated by CD

| <b>Ionic conditions</b>                   | <b>ATP</b> | <b>Melting temperature (°C)</b> |                       |
|-------------------------------------------|------------|---------------------------------|-----------------------|
|                                           |            | <b>0 wt% PEG 200</b>            | <b>40 wt% PEG 200</b> |
| 100 mM NaCl                               | –          | 45.0                            | 47.0                  |
| 100 mM NaCl                               | +          | 48.0                            | 49.5                  |
| 100 mM NaCl<br>and 1 mM MgCl <sub>2</sub> | –          | 45.5                            | 46.5                  |
| 100 mM NaCl<br>and 1 mM MgCl <sub>2</sub> | +          | 49.0                            | 50.0                  |
| 5 mM MgCl <sub>2</sub>                    | –          | 47.0                            | 49.5                  |
| 5 mM MgCl <sub>2</sub>                    | +          | 48.0                            | 50.0                  |

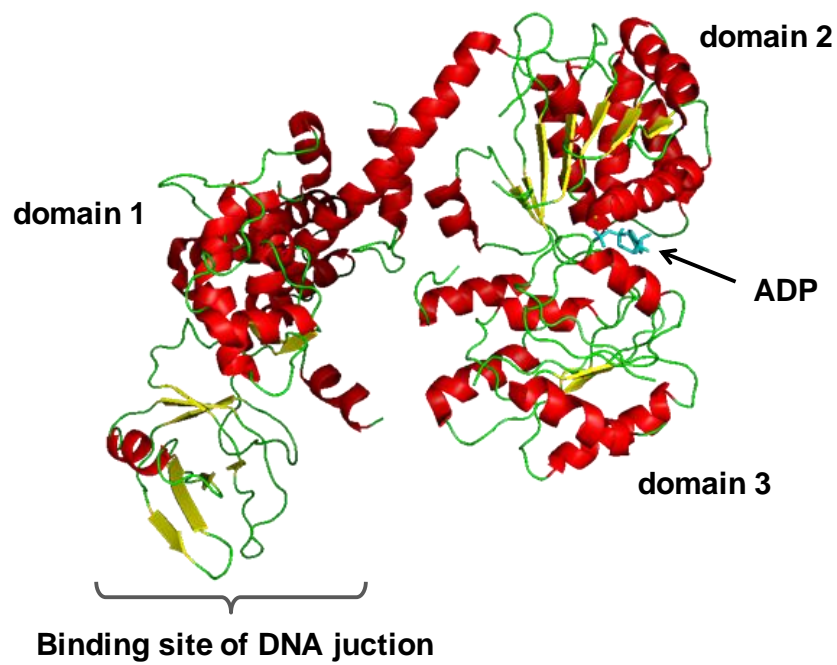

**Figure S1.** Crystal structure of *Thermotoga maritime* RecG (PDB ID: 1GM5).

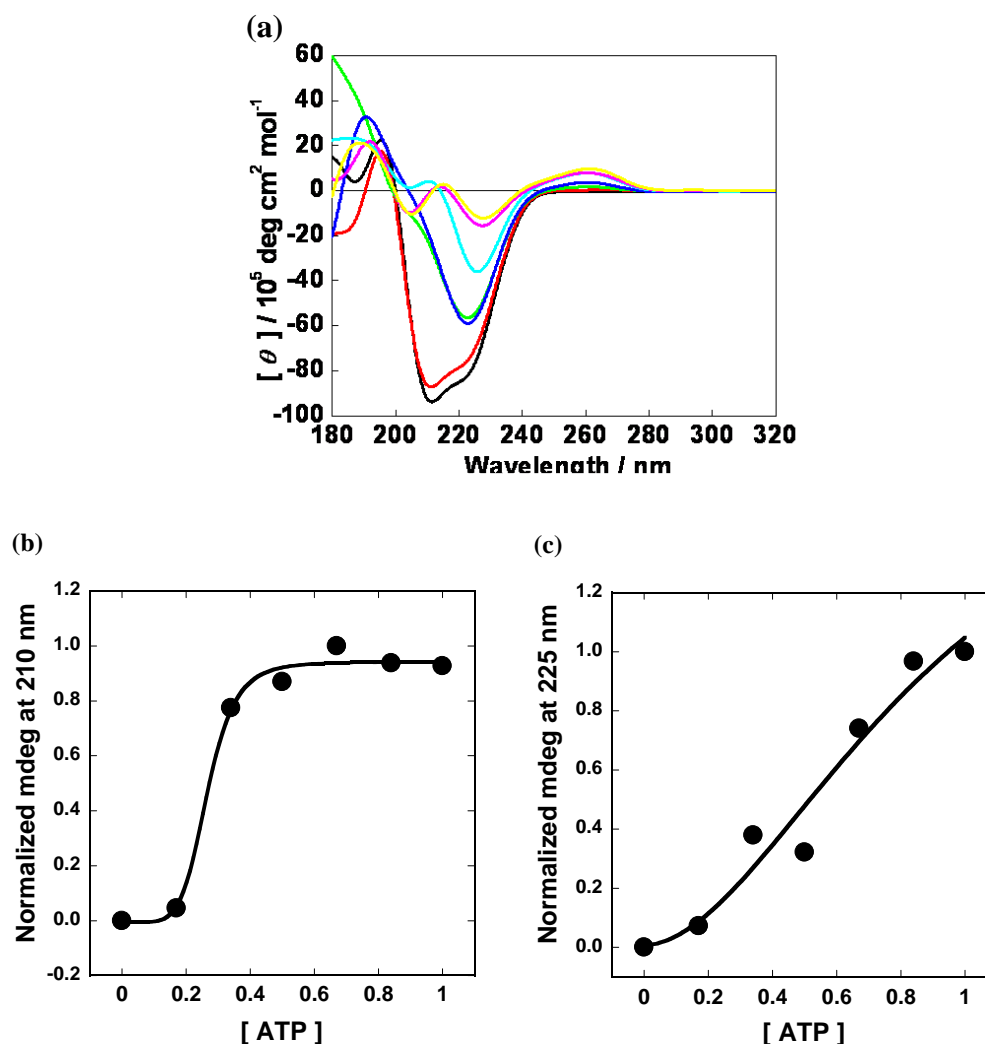

**Figure S2.** (a) CD spectra of 5  $\mu\text{M}$  RecG. Measurements were carried out at 37  $^{\circ}\text{C}$  in 30 mM MES buffer (pH 7.0) containing 100 mM NaCl, 1 mM  $\text{MgCl}_2$ , and 0.5 mM  $\text{Na}_2\text{EDTA}$  at 0 wt% PEG 200 without ATP (black), with 0.17 mM ATP (red), 0.34 mM ATP (green), with 0.51 mM ATP (blue), 0.68 mM ATP (cyan), 0.85 mM ATP (pink), and with 1 mM ATP (yellow). (b) and (c) Plots of normalized molar ellipticities at (b) 210 nm and (c) 225 nm versus [ATP] at 0 mM, 0.17 mM, 0.34 mM, 0.51 mM, 0.68 mM, 0.85 mM, and 1 mM. Measurements were carried out at 37  $^{\circ}\text{C}$  in 30 mM MES buffer (pH 7.0) containing 100 mM NaCl, 1 mM  $\text{MgCl}_2$ , and 0.5 mM  $\text{Na}_2\text{EDTA}$  at 0 wt% PEG 200.

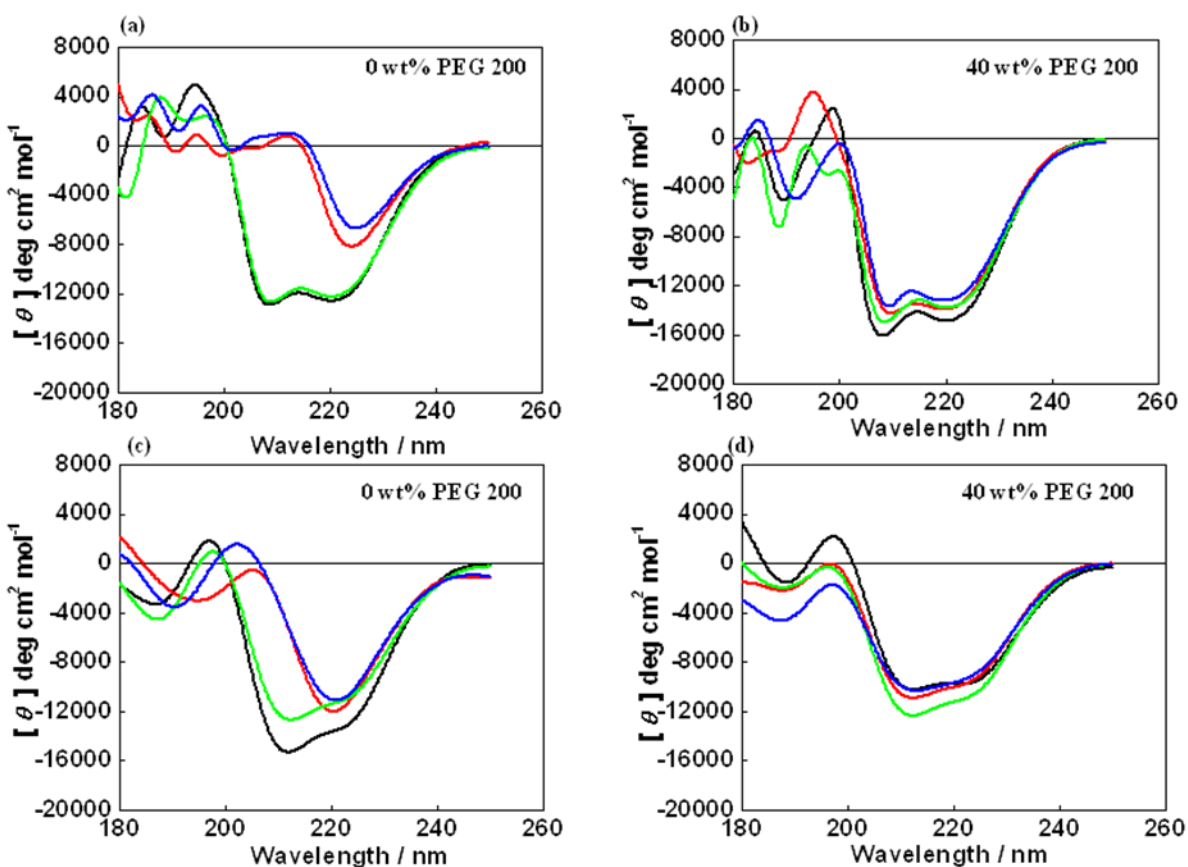

**Figure S3.** (a) CD spectra of 5  $\mu$ M RecG. Measurements were carried out in 30 mM MES buffer (pH 7.0) containing (a) 100 mM NaCl, 1 mM MgCl<sub>2</sub>, and 0.5 mM Na<sub>2</sub>EDTA at 0 wt% PEG 200 without ATP at 4 °C (black) and at 37 °C (green) or with ATP at 4 °C (red) and 37 °C (blue). (b) Measurements were carried out in 100 mM NaCl, 1 mM MgCl<sub>2</sub>, and 0.5 mM Na<sub>2</sub>EDTA at 40 wt% PEG 200 without ATP at 4 °C (black) and 37 °C (green) or with ATP at 4 °C (red) and 37 °C (blue). (c) Measurements were carried out in 5 mM MgCl<sub>2</sub> and 0.5 mM Na<sub>2</sub>EDTA at 0 wt% PEG 200 without ATP at 4 °C (black) and 37 °C (green) or with ATP at 4 °C (red) and 37 °C (blue). (d) Measurements were carried out in 5 mM MgCl<sub>2</sub> and 0.5 mM Na<sub>2</sub>EDTA at 40 wt% PEG 200 without ATP at 4 °C (black) and 37 °C (green) or with ATP at 4 °C (red) and 37 °C (blue).

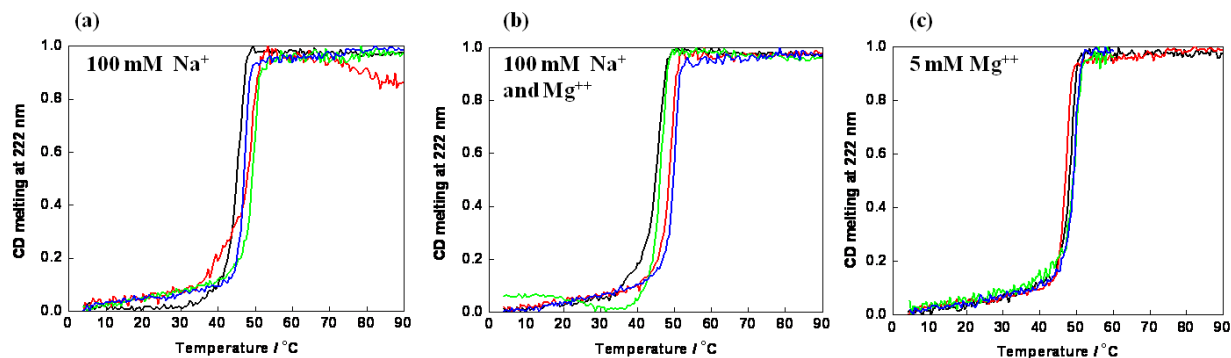

**Figure S4.** CD melting curves at 222 nm of 5  $\mu$ M RecG. Measurements were carried out in 30 mM MES buffer (pH 7.0) and 0.5 mM Na<sub>2</sub>EDTA at 0 wt% PEG 200 without ATP (black), in 0 wt% PEG 200 with 1 mM ATP (red), in 40 wt% PEG 200 without ATP (green), and in 40 wt% PEG 200 with 1 mM ATP (blue). Buffer contained (a) 100 mM NaCl, (b) 100 mM NaCl and 1 mM MgCl<sub>2</sub>, and (c) 5 mM MgCl<sub>2</sub>.

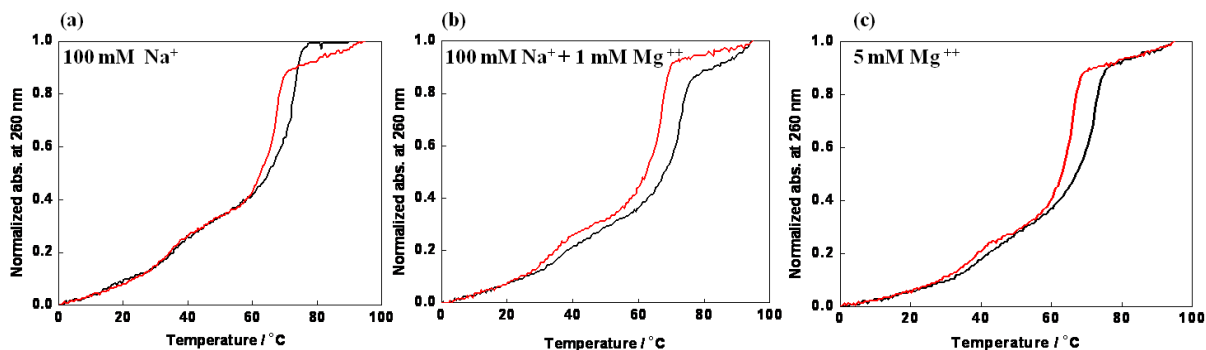

**Figure S5.** Normalized UV melting curves of 1  $\mu\text{M}$  DNA frayed duplex. Measurements were carried out in 30 mM MES buffer (pH 7.0) at 0 wt% PEG 200 (black) and 40 wt% PEG 200 (red) containing (a) 100 mM NaCl, (b) 100 mM NaCl and 1 mM  $\text{MgCl}_2$ , or (c) 5 mM  $\text{MgCl}_2$ .

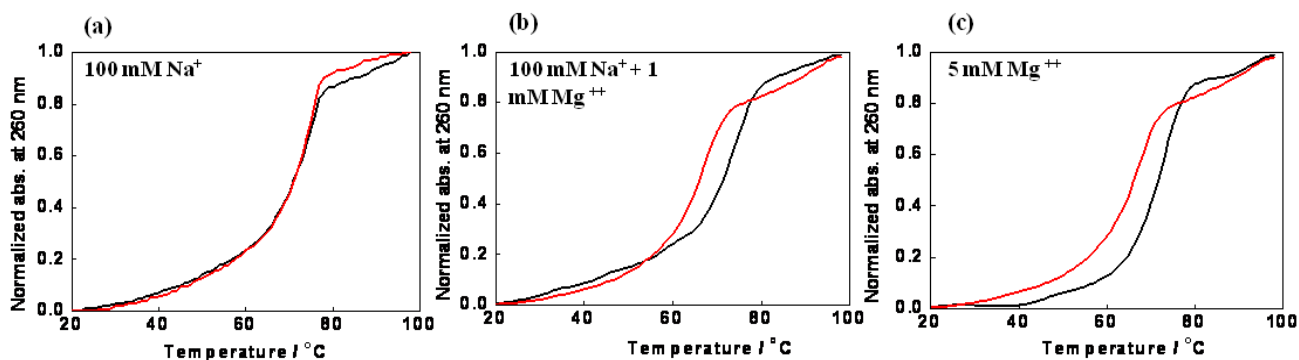

**Figure S6.** Normalized UV melting curves of 1  $\mu\text{M}$  stem region of frayed duplex. Measurements were carried out in 30 mM MES buffer (pH 7.0) at 0 wt% PEG 200 (black) and 40 wt% PEG 200 (red) containing (a) 100 mM NaCl, (b) 100 mM NaCl and 1 mM  $\text{MgCl}_2$ , or (c) 5 mM  $\text{MgCl}_2$ .



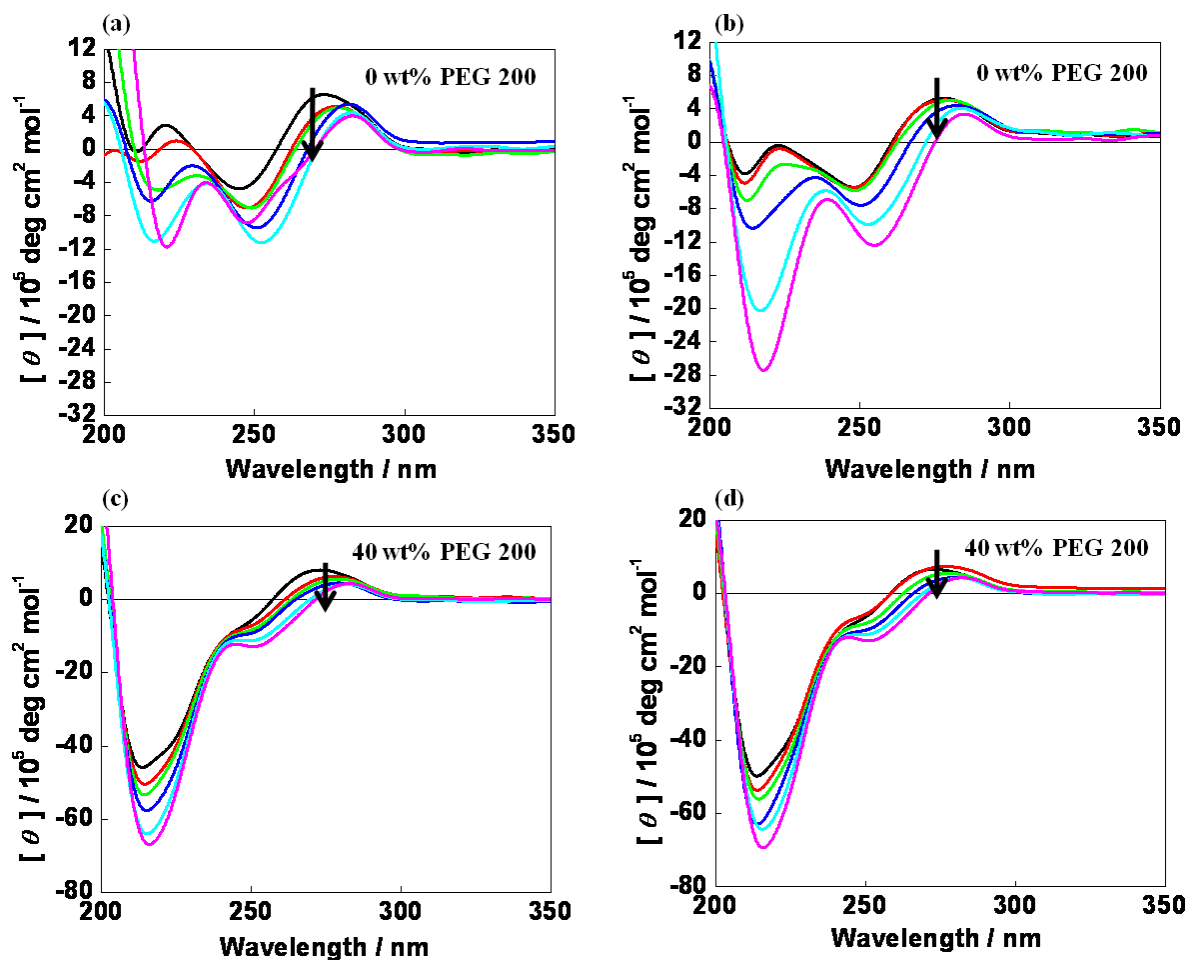

**Figure S9.** CD spectra of 1  $\mu$ M frayed duplex. Measurements were carried out at 37 °C in 30 mM MES buffer (pH 7.0), 0.5 mM Na<sub>2</sub>EDTA, titrated with 0 nM RecG and 0 mM ATP (black), 50 nM RecG and 0.1 mM ATP (red), 100 nM RecG and 0.2 mM ATP (green), 150 nM RecG and 0.3 mM ATP (blue), 200 nM RecG and 0.4 mM ATP (cyan), and 250 nM RecG and 0.5 mM ATP (pink), containing (a) 100 mM NaCl and 1 mM MgCl<sub>2</sub> at 0 wt% PEG 200, (b) 100 mM NaCl and 1 mM MgCl<sub>2</sub> at 40 wt% PEG 200, (c) 5 mM MgCl<sub>2</sub> at 0 wt% PEG 200, and (d) 5 mM MgCl<sub>2</sub> at 40 wt% PEG 200.
